# Supplementary material for: P–N heterojunction-enhanced structural stability of tungsten disulfide nanosheets for highly efficient, stable alkaline water electrolysis
Source: Royal Society of Chemistry journal article supplement (doi:10.1039/d5ra08680a), 2025-01-01
Supplement: d5ra08680a1.pdf [file d5ra08680a1.pdf]

## Supporting information

### **P-N Heterojunction-Enhanced Structural Stability of Tungsten Disulfide Nanosheets for Highly Efficient, Stable Alkaline Water Electrolysis**

*Kumasser Kusse Kuchayita,<sup>a</sup> Yohannes Asmare Fesseha,<sup>a</sup> Chih-Wei Chiu,<sup>c</sup> Jem-Kun Chen,<sup>c</sup> Ai-*

*Wei Lee<sup>d\*</sup> and Chih-Chia Cheng<sup>ab\*</sup>*

- a. Graduate Institute of Applied Science and Technology, National Taiwan University of Science and Technology, Taipei 10607, Taiwan. E-mail: [cccheng@mail.ntust.edu.tw](mailto:cccheng@mail.ntust.edu.tw)
- b. Advanced Membrane Materials Research Center, National Taiwan University of Science and Technology, Taipei 10607, Taiwan.
- c. Department of Materials Science and Engineering, National Taiwan University of Science and Technology, Taipei 10607, Taiwan.
- d. Department of Anatomy and Cell Biology, School of Medicine, College of Medicine, Taipei Medical University, Taipei, 11031, Taiwan. E-mail: [ammielee@tmu.edu.tw](mailto:ammielee@tmu.edu.tw)

\* Corresponding author is marked with an asterisk (\*) in the complete list of authors.

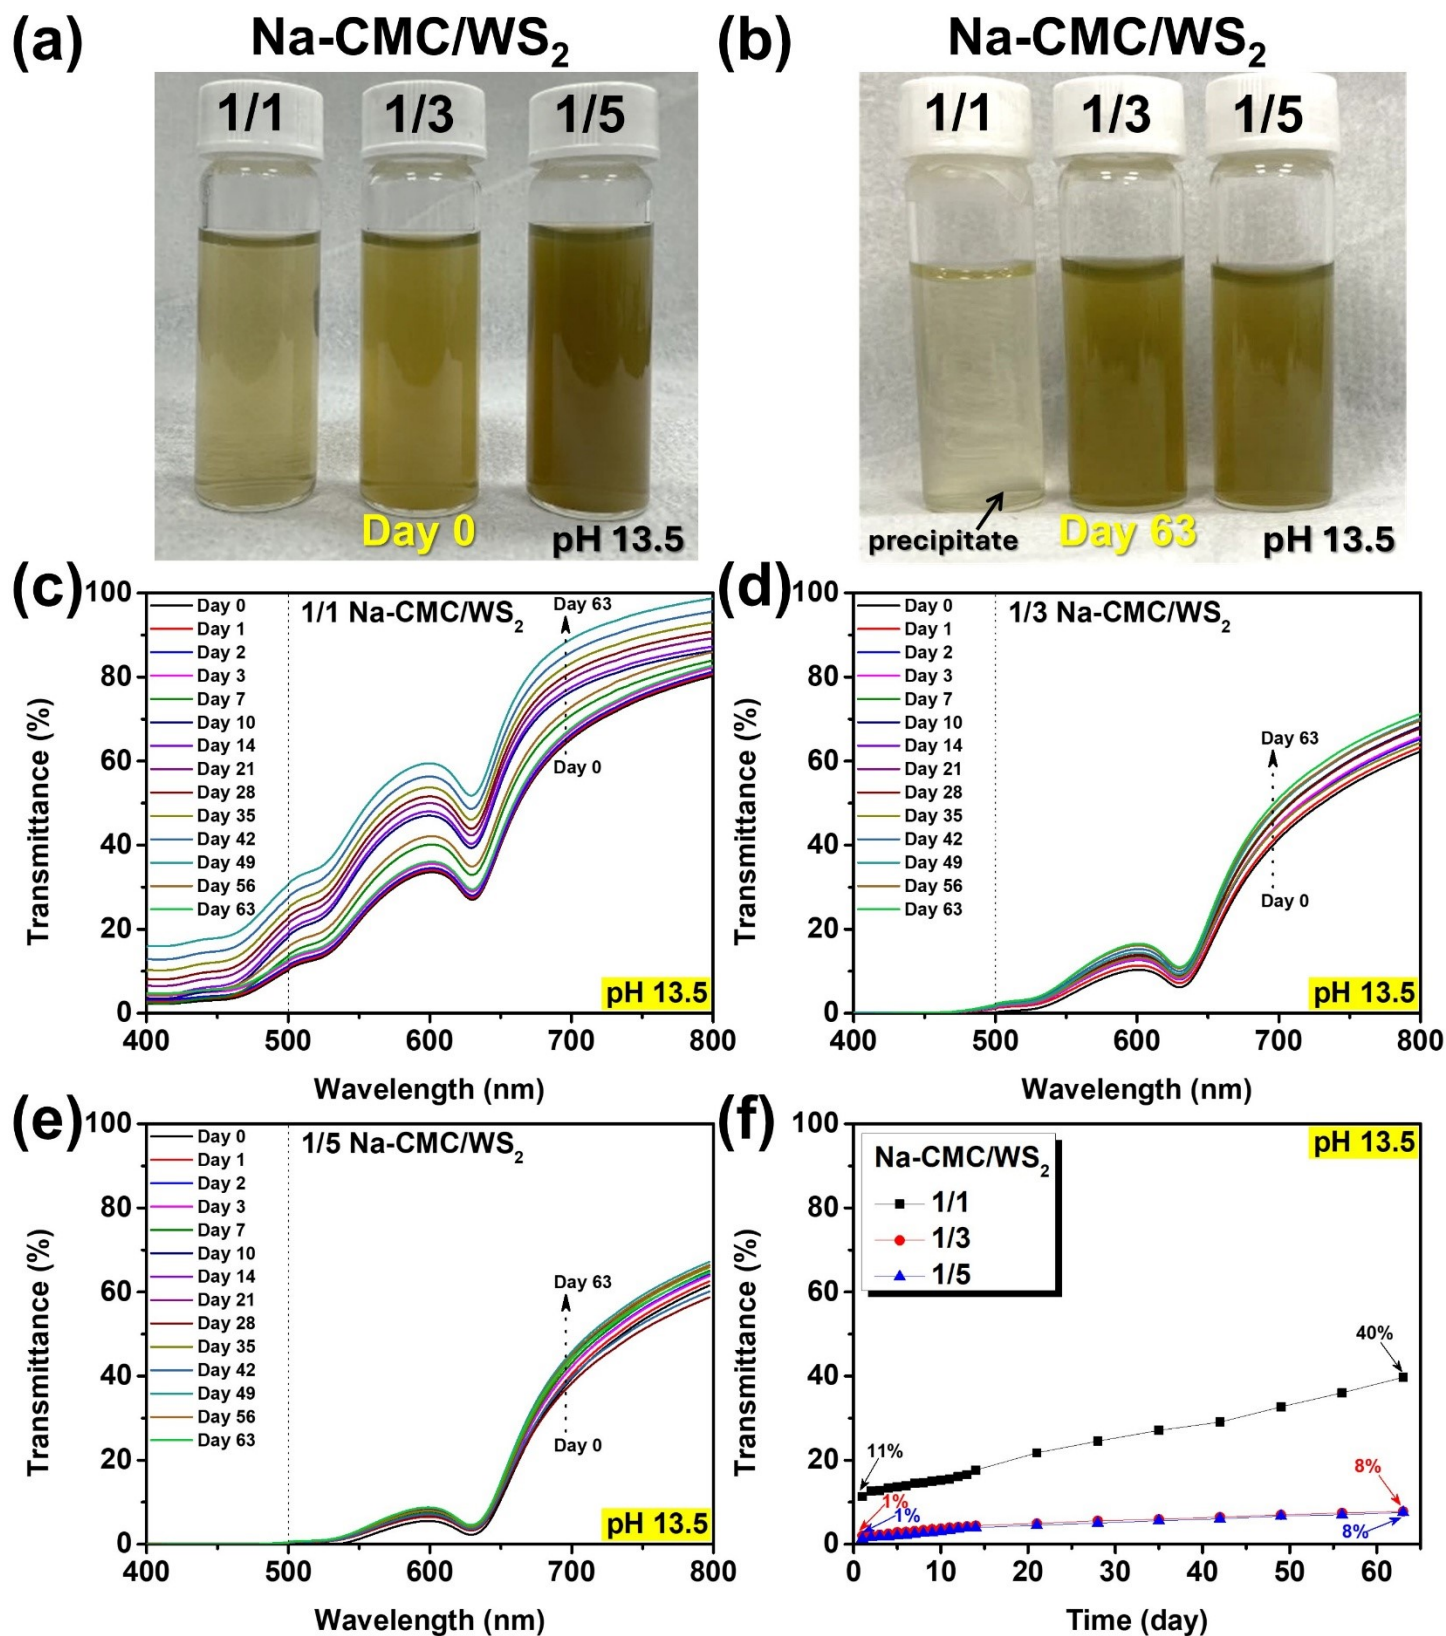

**Fig. S1:** Photographs of 1/1, 1/3, and 1/5 Na-CMC/WS<sub>2</sub> nanosheets in water at pH 13.5 on (a) day 0 and (b) day 63. Time-dependent transmittance (%) at 500 nm of (c) 1/1, (d) 1/3, and (e) 1/5 Na-CMC/WS<sub>2</sub> nanosheets in water at pH 13.5 recorded at 25 °C. (f) Summary plot of time-dependent transmittance at 500 nm for 1/1, 1/3, and 1/5 Na-CMC/WS<sub>2</sub> nanosheets in water at pH 13.5 over a 63-day monitoring period at 25 °C.

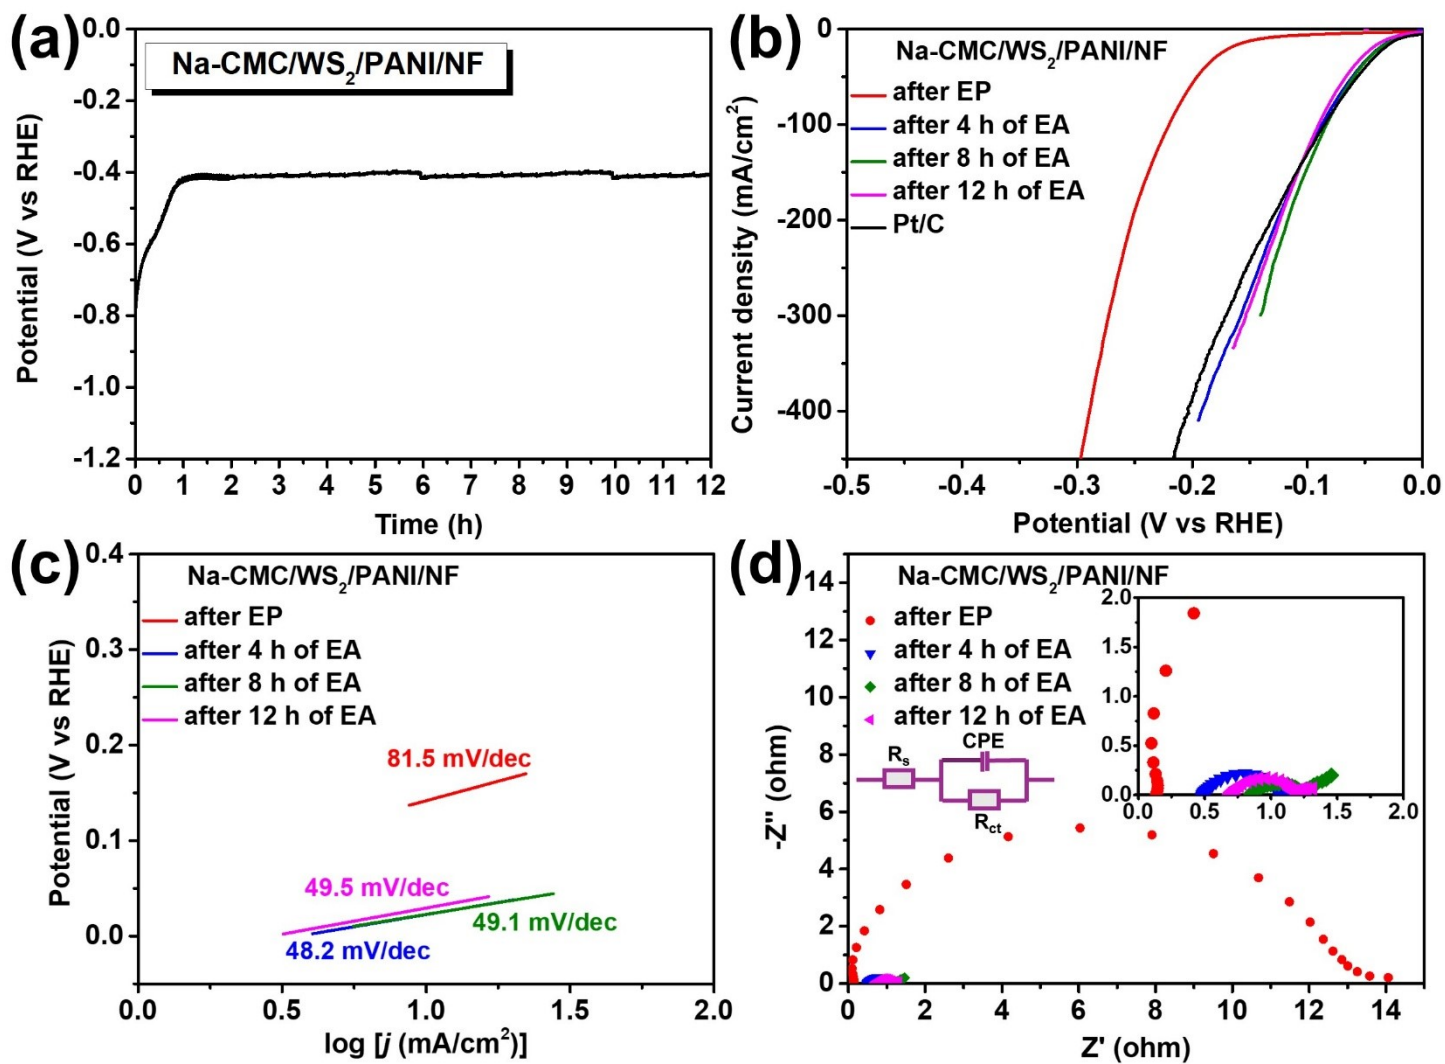

**Fig. S2:** (a) Chronopotentiometric curve for the EP-treated Na-CMC/WS<sub>2</sub>/PANI/NF electrode at a constant current density of 500 mA cm<sup>-2</sup> in 1.0 M KOH electrolyte for 12 h. (b) LSV curves, (c) Tafel plots, and (d) EIS Nyquist plots of Pt/C, EP-treated Na-CMC/WS<sub>2</sub>/PANI/NF, and Na-CMC/WS<sub>2</sub>/PANI/NF electrodes subjected to EA treatment for various durations in 1.0 M KOH electrolyte. (d) The inset on the left shows the equivalent circuit model used to fit the experimental data.

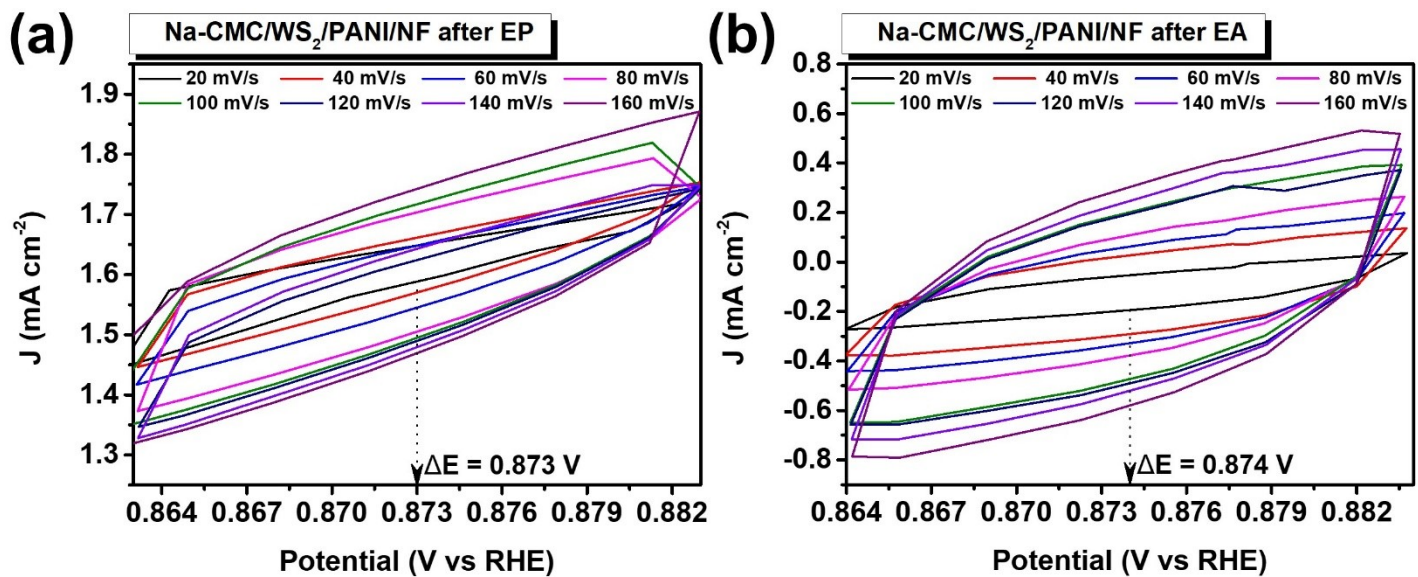

**Fig. S3:** Measurement of  $C_{dl}$  CV curves of the (a) EP-treated and (b) EA-treated Na-CMC/WS<sub>2</sub>/PANI/NF electrodes in 1.0 M KOH aqueous solution at different scan rates.



## Original NF

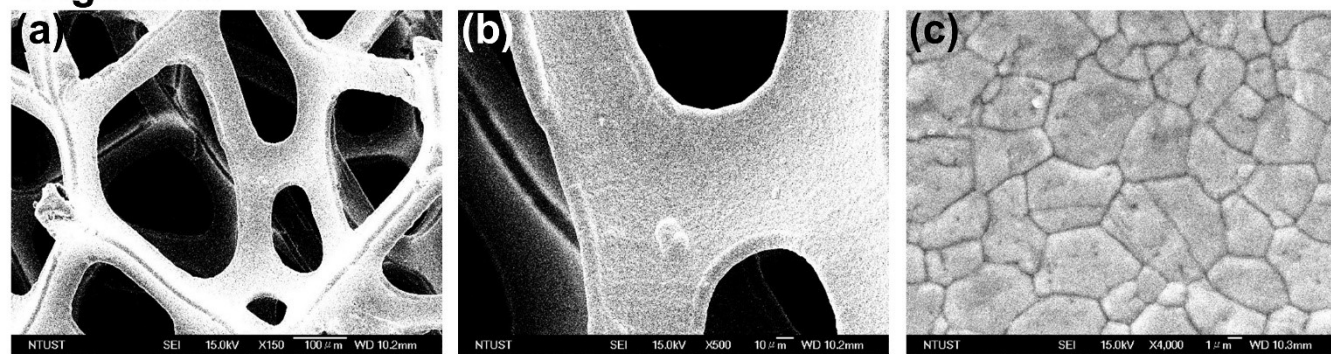

## Na-CMC/WS<sub>2</sub>/PANI/NF after EP

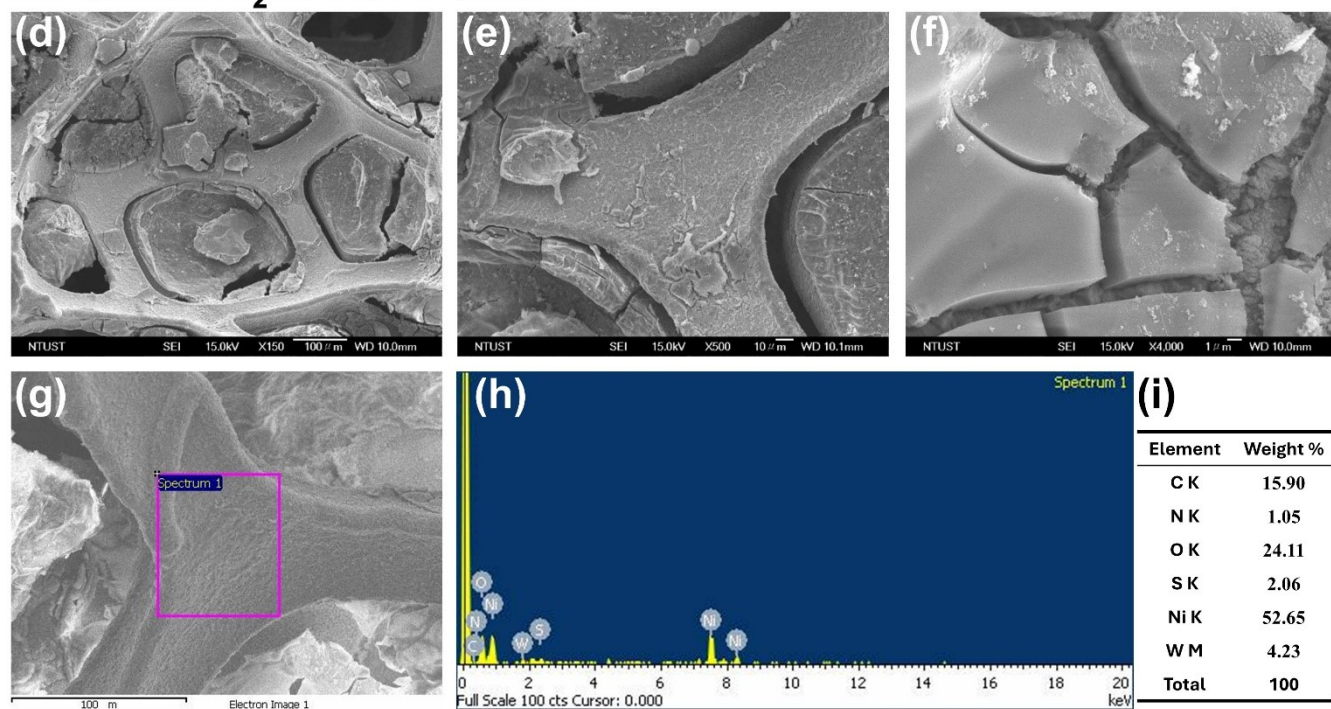

**Fig. S4:** SEM images of pristine NF at magnifications of (a)  $\times 150$ , (b)  $\times 500$ , and (c)  $\times 4,000$ . SEM images of the EP-treated Na-CMC/WS<sub>2</sub>/PANI/NF electrode at magnifications of (d)  $\times 150$ , (e)  $\times 500$ , and (f)  $\times 4,000$ . (g) SEM image of the EP-treated Na-CMC/WS<sub>2</sub>/PANI/NF electrode, along with (h) the corresponding EDX spectrum and (i) the elemental weight percentage composition.

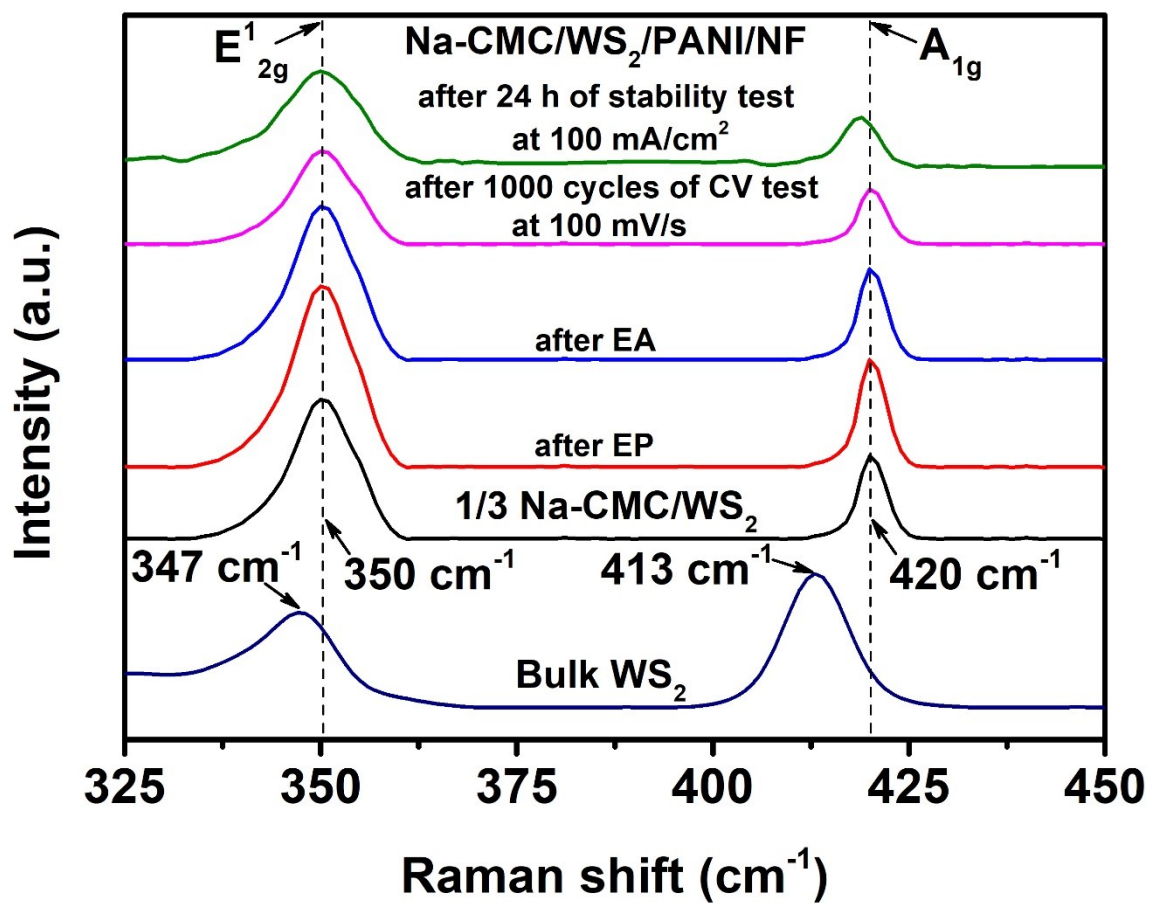

**Fig. S5:** Raman spectra recorded at 25 °C for bulk WS<sub>2</sub> crystals, the 1/3 Na-CMC/WS<sub>2</sub> composite, the EP-treated electrode, the EA-treated electrode, and the EA-treated Na-CMC/WS<sub>2</sub>/PANI/NF electrode after a 24-h stability test at 100 mA cm<sup>-2</sup> and 1000 CV cycles in 1 M KOH solution.

**Table S1:** Comparison of the HER performance of representative WS<sub>2</sub>-based electrocatalysts in 1 M KOH solution.

| Catalyst                                      | Electrolyte | $\eta$ at $-10 \text{ mA cm}^{-2}$<br>(mV vs. RHE) | Tafel slope<br>(mV dec <sup>-1</sup> ) | Ref.      |
|-----------------------------------------------|-------------|----------------------------------------------------|----------------------------------------|-----------|
| WS <sub>2</sub> @UiO-66/NF                    | 1 M KOH     | 121                                                | 83                                     | [28]      |
| Exfoliated WS <sub>2</sub> /NF                | 1 M KOH     | 153                                                | 283                                    | [28]      |
| WS <sub>2</sub> /CC                           | 1 M KOH     | 235                                                | 174                                    | [36]      |
| 1T-WS <sub>2</sub>  P-5@CFP                   | 1 M KOH     | 190                                                | 92                                     | [37]      |
| WS <sub>2</sub> /CoS <sub>2</sub> /CC         | 1 M KOH     | 146                                                | 64                                     | [38]      |
| WS <sub>2</sub> /CoS <sub>2</sub> /Cu         | 1 M KOH     | 252                                                | 70                                     | [39]      |
| 5% WS <sub>2</sub> -MXene/NF                  | 1 M KOH     | 66                                                 | 47                                     | [40]      |
| CeO <sub>2</sub> /WS <sub>2</sub> /CC         | 1 M KOH     | 276                                                | 200                                    | [41]      |
| WS <sub>2</sub> /CC                           | 1 M KOH     | 340                                                | 174                                    | [41]      |
| EP-treated<br>Na-CMC/WS <sub>2</sub> /PANI/NF | 1 M KOH     | 142                                                | 82                                     | This work |
| EA-treated<br>Na-CMC/WS <sub>2</sub> /PANI/NF | 1 M KOH     | 25                                                 | 48                                     | This work |

CC: carbon close; CFP: carbon fiber paper; GC: glassy carbon; Cu: copper; NF: nickel foam; GF: graphite foam
